# Supplementary material
Source: PubMed Central journal article supplement (PMC1253600)

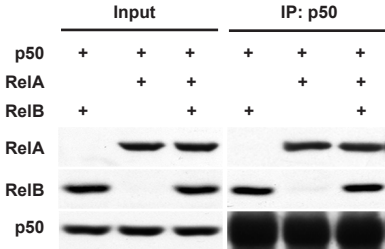

Supplement: pnas_0507342102_1.pdf [file pnas_0507342102_1.pdf]

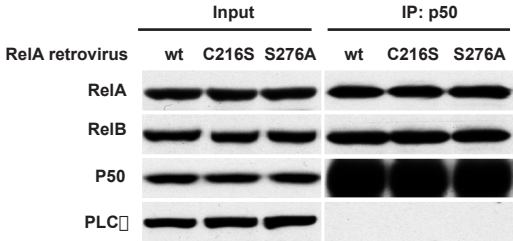

Supplement: pnas_0507342102_2.pdf [file pnas_0507342102_2.pdf]

**A**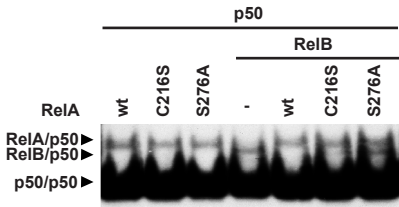**B**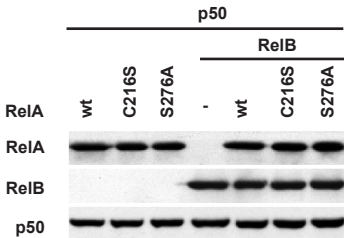

Supplement: pnas_0507342102_3.pdf [file pnas_0507342102_3.pdf]

**A**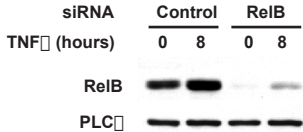**B**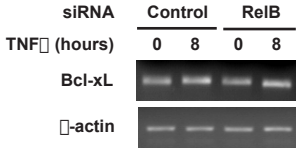

Supplement: pnas_0507342102_4.pdf [file pnas_0507342102_4.pdf]
